# Supplementary material for: Efficient capture of high-quality real-world data on treatments for glaucoma: the Fight Glaucoma Blindness! Registry
Source: PubMed Central journal article supplement — BMJ Open Ophthalmol. 2021 Nov 5;6(1):e000903. doi: 10.1136/bmjophth-2021-000903 (PMC8573655; doi:10.1136/bmjophth-2021-000903), 2021-11-05
Supplement: bmjophth-2021-000903supp001.pdf [file bmjophth-2021-000903supp001.pdf]

**Supplementary Table 1.** Baseline demographic and clinical characteristics for eyes with finalized baseline visits.

---

|                                  |                   |
|----------------------------------|-------------------|
| Eyes                             | 4300              |
| Patients                         | 2333              |
| Gender, % female patients        | 53.3%             |
| Age, median years (Q1, Q3)       | 71 (65, 78)       |
| IOP, median mmHg (Q1, Q3)        | 17 (14, 22)       |
| Medications, median (Q1, Q3)     | 1 (0, 3)          |
| CCT, median (Q1, Q3)             | 536 (512, 560)    |
| Visual field MD, median (Q1, Q3) | -3.9 (-9.1, -1.3) |
| RNFLT, median (Q1, Q3)           | 74 (63, 85)       |

---

**Supplementary Table 2.** Most common saved and finalized individual procedures

| <b>Procedure Name</b>                                | <b>Frequency (%)</b> |
|------------------------------------------------------|----------------------|
| Cataract and Lens Implant                            | 3218 (35.7%)         |
| iStent Inject G2                                     | 2316 (25.7%)         |
| SLT (180 Degrees)                                    | 497 (5.5%)           |
| Trabeculectomy                                       | 439 (4.9%)           |
| Bleb Needling                                        | 397 (4.4%)           |
| Hydrus                                               | 390 (4.3%)           |
| Xen Implant                                          | 344 (3.8%)           |
| Aqueous Shunt (With Reservoir) - Baerveldt 350 - 101 | 251 (2.8%)           |
| SLT (360 Degrees)                                    | 245 (2.7%)           |
| Peripheral Iridotomy                                 | 136 (1.5%)           |
| iStent Inject G2W                                    | 118 (1.3%)           |
| iStent G1                                            | 117 (1.3%)           |
| Other Intraocular Surgery Excluding Cataract         | 80 (0.9%)            |
| Cypass                                               | 58 (0.6%)            |
| Revision of Glaucoma Device                          | 55 (0.6%)            |
| Posterior Vitrectomy                                 | 54 (0.6%)            |
| Revision Trabeculectomy                              | 54 (0.6%)            |
| Removal of Intraluminal Stent From Aqueous Shunt     | 49 (0.5%)            |
| Cyclodiode Laser Transscleral                        | 44 (0.5%)            |
| Revision of Baerveldt Tube                           | 17 (0.2%)            |
| Goniosynechiolysis                                   | 15 (0.2%)            |
| ALT 180 Degrees                                      | 12 (0.1%)            |
| ALT 360 Degrees                                      | 12 (0.1%)            |
| Trabeculotomy                                        | 12 (0.1%)            |
| Iridoplasty                                          | 11 (0.1%)            |
| 2nd Trabeculectomy                                   | 10 (0.1%)            |
| Aqueous Shunt (With Reservoir) - Baerveldt 250       | 10 (0.1%)            |
| Anterior Vitrectomy                                  | 9 (0.1%)             |

---

|                                                                      |          |
|----------------------------------------------------------------------|----------|
| Deep Sclerectomy                                                     | 8 (0.1%) |
| Explant of Glaucoma Device                                           | 8 (0.1%) |
| Hemigatt Gonioscopy-assisted Transluminal Trabeculotomy (180Degrees) | 6 (0.1%) |
| iTrack Ab Interno Canaloplasty                                       | 6 (0.1%) |
| Corneal Transplant Endothelial Transplant                            | 5 (0.1%) |
| Preserflo Microshunt                                                 | 5 (0.1%) |
| Paul Glaucoma Implant                                                | 4 (0%)   |
| Cyclodiode Laser Endoscopic                                          | 3 (0%)   |
| Drainage of Choroidal Effusions                                      | 3 (0%)   |
| Corneal Refractive Surgery                                           | 2 (0%)   |

---
